# Supplementary material
Source: PubMed Central journal article supplement (PMC11193891)

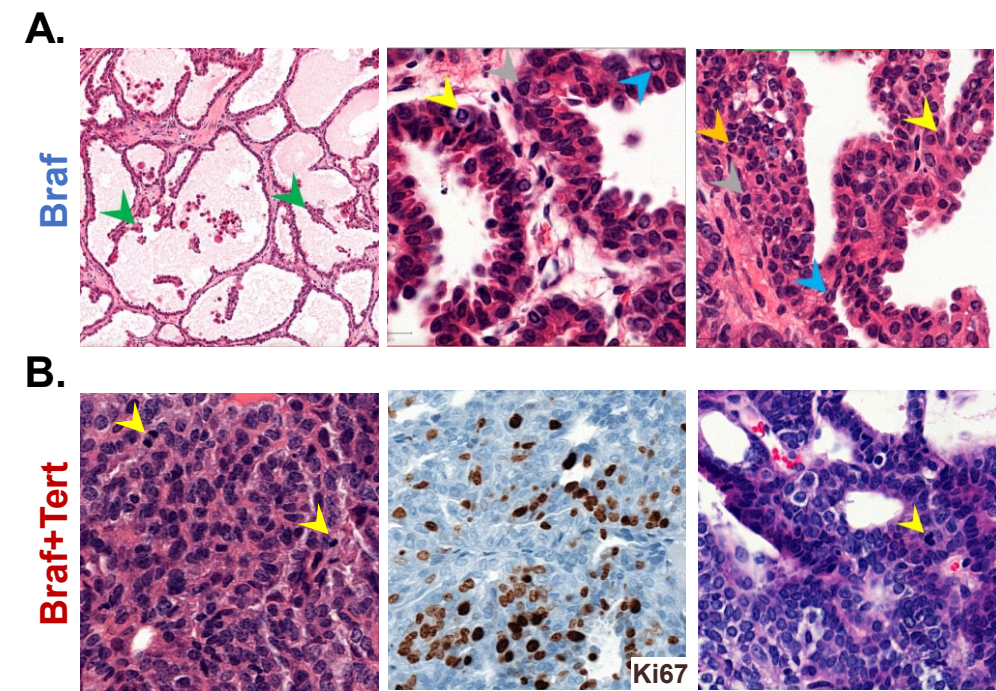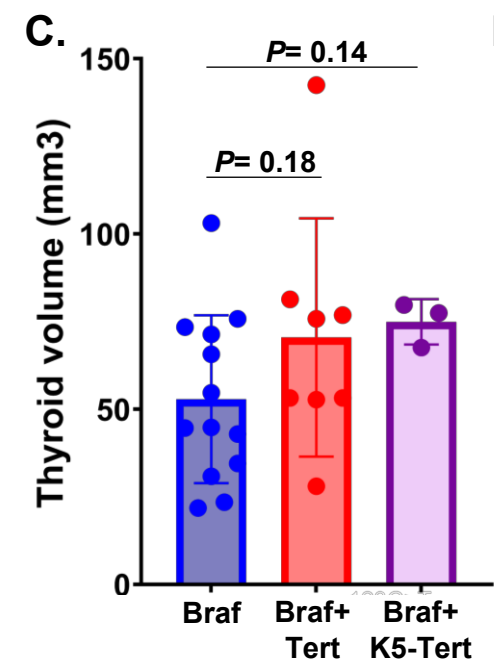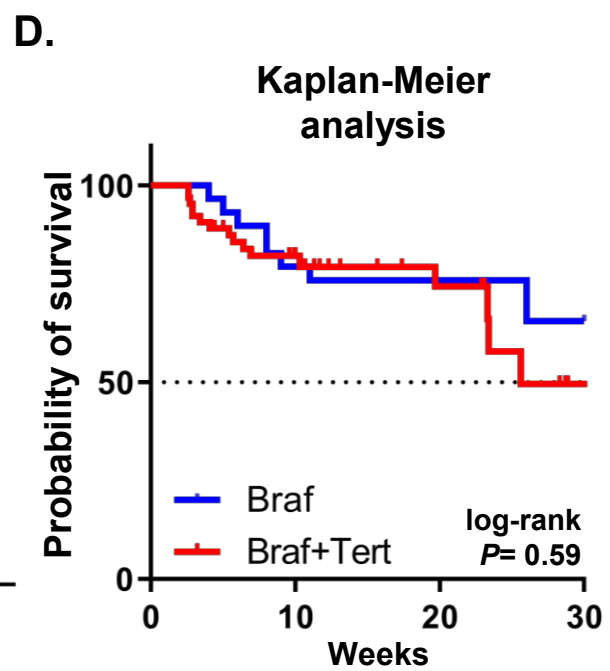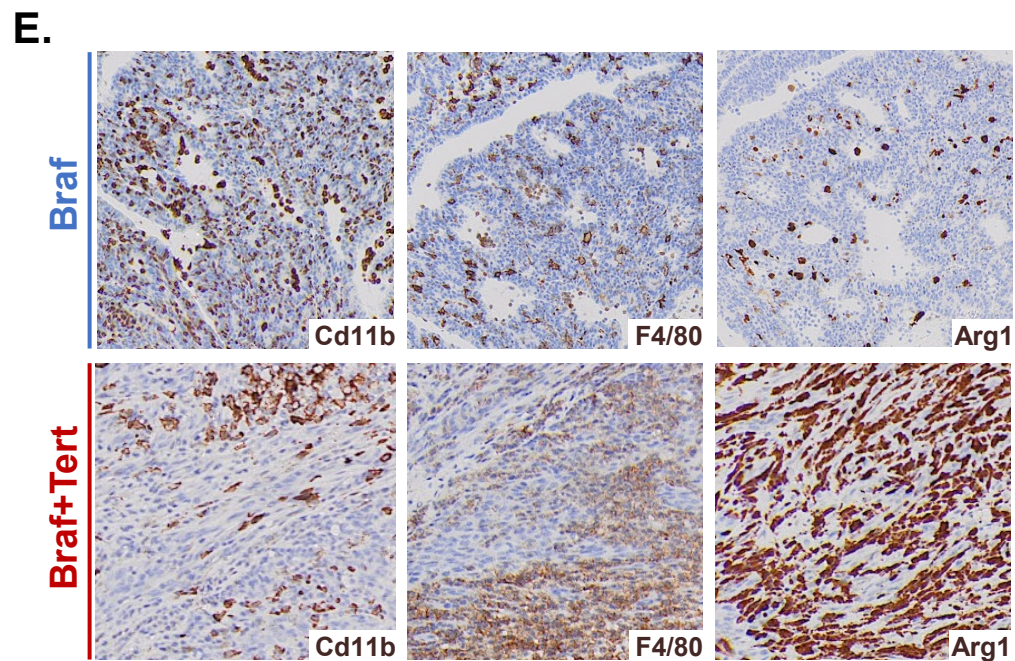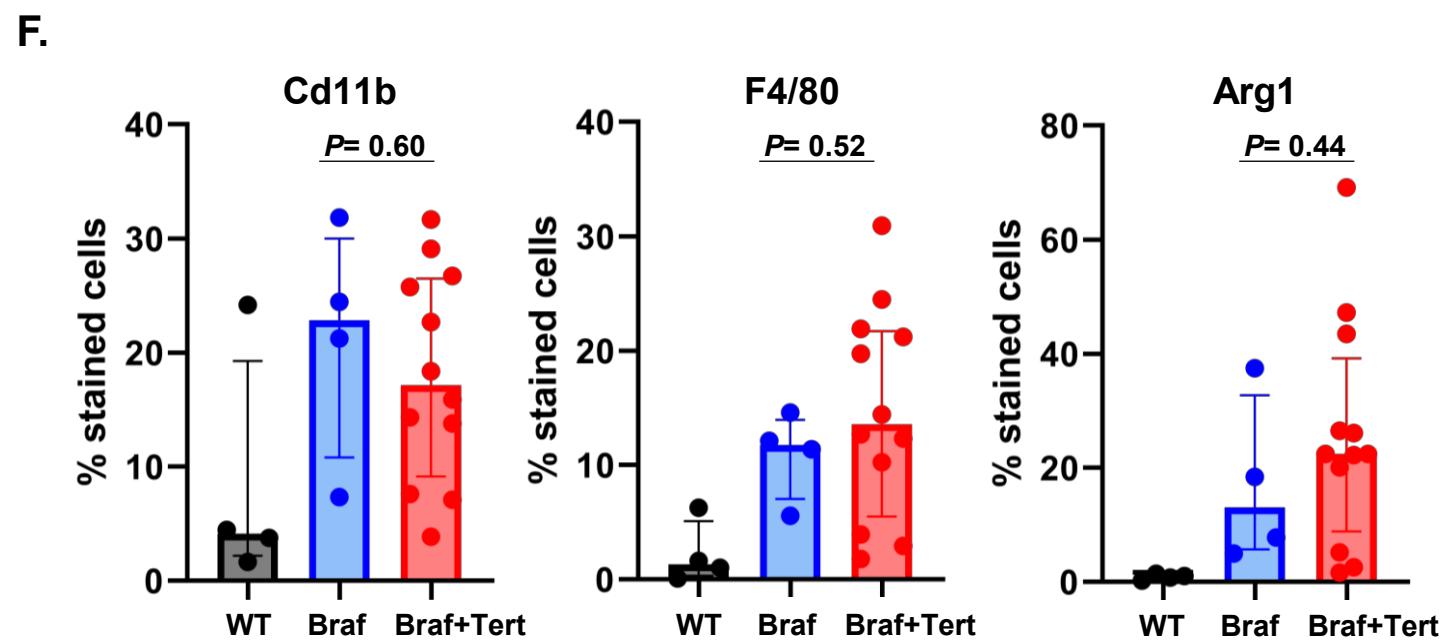

Supplement: NIHMS2000161-supplement-Suppl_Fig_2.pdf [file NIHMS2000161-supplement-Suppl_Fig_2.pdf]
